# Supplementary material
Source: publisher site journal article supplement (https://www.dovepress.com/article/304527)
Supplement: Supplementary file 1 [file get_supplementary_file.php]

| **Appendix: List of ICD-9 Diagnosis Codes for acute exacerbations of COPD at hospital admission** | |
| --- | --- |
| ICD9 diagnosis code  with extension | Full description |
| 496 (1) | Chronic obstructive pulmonary disease |
| 496 (3) | Chronic obstructive pulmonary disease with acute lower respiratory infection |
| 491.20 (0) | Chronic obstructive bronchitis |
| 491.21 (0) | Chronic obstructive bronchitis with acute exacerbation |
| 491.9 (0) | Chronic bronchitis |
| 487.0 (0) | Influenza with pneumonia |
| 487.8 (0) | Influenza |
| 487.8 (3) | Influenza due to identified influenza virus |
| 486 (0) | Pneumonia |
| 485 (0) | Bronchopneumonia |
| 481 (0) | Streptococcus pneumoniae pneumonia |
| 481 (1) | Lobar pneumonia |
| 480.9 (0) | Viral pneumonia |
| 466.0 (0) | Acute bronchitis |
| 466.0 (4) | Acute bronchitis due to mycoplasma pneumoniae |
| 466.0 (5) | Acute bronchitis due to haemophilus influenzae |
| 466.0 (6) | Acute bronchitis due to streptococcus |
| 466.0 (7) | Acute bronchitis due to coxsackievirus |
| 466.0 (8) | Acute bronchitis due to parainfluenza virus |
| 466.0 (9) | Acute bronchitis due to respiratory syncytial virus |
| 466.0 (10) | Acute bronchitis due to rhinovirus |
| 466.0 (11) | Acute bronchitis due to echovirus |
